# Supplementary material for: Chalcone coating on cotton cloth – an approach to reduce attachment of live microbes
Source: Royal Society of Chemistry journal article supplement (doi:10.1039/c3bm60312a), 2014-01-01
Supplement: c3bm60312a.pdf [file c3bm60312a.pdf]

**Supporting Table and figure:**

**Table S1. SEM-EDAX of uncoated and coated cloth**

| Element | Uncoated          |                 | Compound 1 coated |                 | Compound 2 coated |                 | Compound 3 coated |                 |
|---------|-------------------|-----------------|-------------------|-----------------|-------------------|-----------------|-------------------|-----------------|
|         | Weight percentage | Atom percentage |
| C       | 42.68             | 63.42           | 43.70             | 62.92           | 41.53             | 61.80           | 43.47             | 62.83           |
| O       | 30.63             | 34.16           | 32.29             | 34.90           | 31.43             | 35.10           | 31.81             | 34.52           |
| S       |                   |                 | 0.14              | 0.08            | 0.70              | 0.39            | 0.44              | 0.24            |
| Cl      |                   |                 |                   |                 | 0.77              | 0.39            | 0.68              | 0.33            |

**Table S2: SEM-EDAX of compound coated cloth before and after washing in water**

| Element | Compound 1 coated |        |               |        | Compound 2 coated |        |               |        | Compound 3 coated |        |               |        |
|---------|-------------------|--------|---------------|--------|-------------------|--------|---------------|--------|-------------------|--------|---------------|--------|
|         | Before washing    |        | After washing |        | Before washing    |        | After washing |        | Before washing    |        | After washing |        |
|         | Weight %          | Atom % | Weight %      | Atom % | Weight %          | Atom % | Weight %      | Atom % | Weight %          | Atom % | Weight %      | Atom % |
| C       | 43.70             | 62.92  | 42.36         | 60.64  | 41.53             | 61.80  | 40.43         | 58.93  | 43.47             | 62.83  | 41.75         | 60.75  |
| O       | 32.29             | 34.90  | 30.51         | 33.52  | 31.43             | 35.10  | 30.62         | 33.67  | 31.81             | 34.52  | 30.32         | 33.68  |
| S       | 0.14              | 0.08   | 0.10          | 0.07   | 0.70              | 0.39   | 0.68          | 0.33   | 0.44              | 0.24   | 0.41          | 0.22   |
| Cl      |                   |        |               |        | 0.77              | 0.39   | 0.76          | 0.34   | 0.68              | 0.33   | 0.63          | 0.32   |

Figure S1. FTIR of (A-C) compounds 1-3 coated cloths.

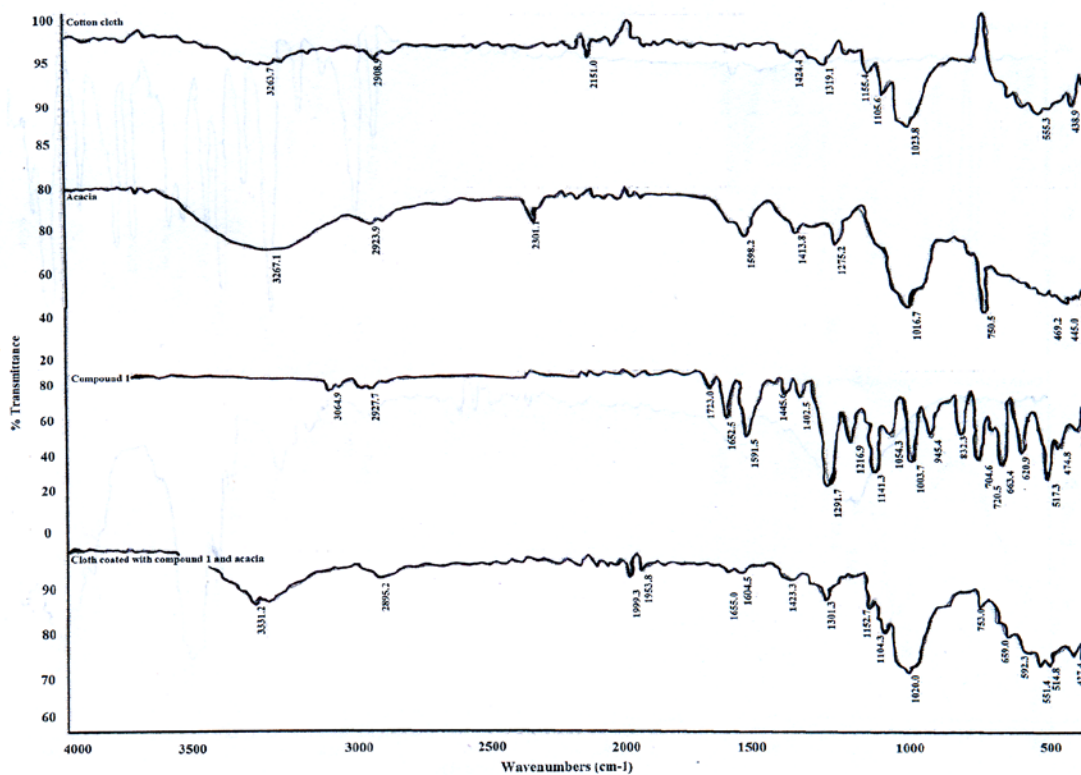

(A)

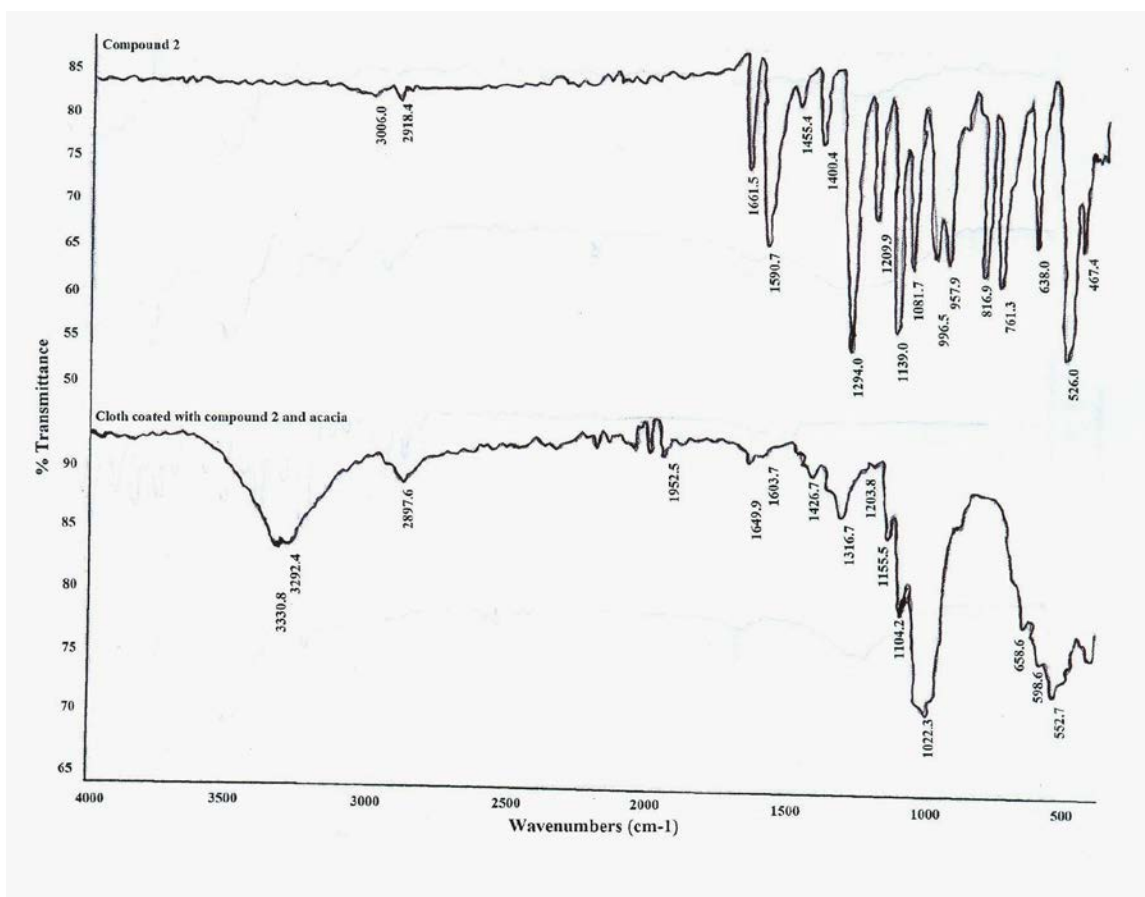

(B)

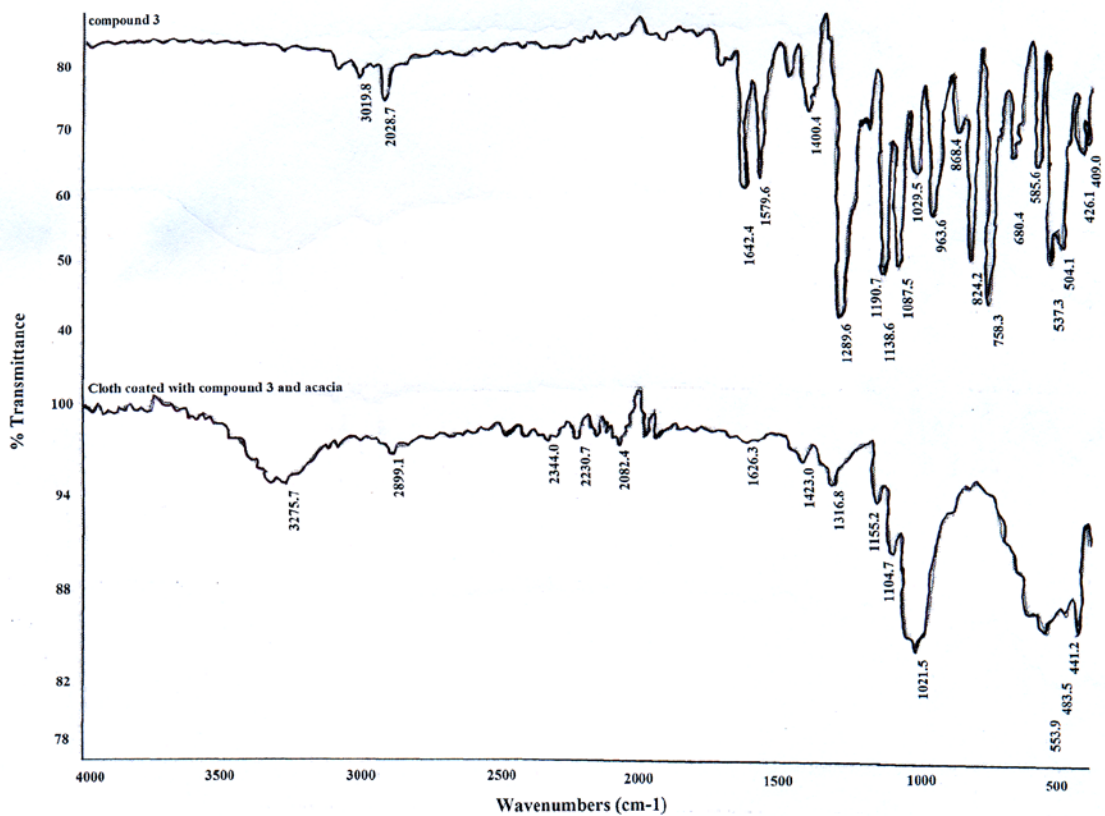

(C)

**Figure S2. EDAX of (A) uncoated and (B-D) compound 1-3 coated cloths respectively.**

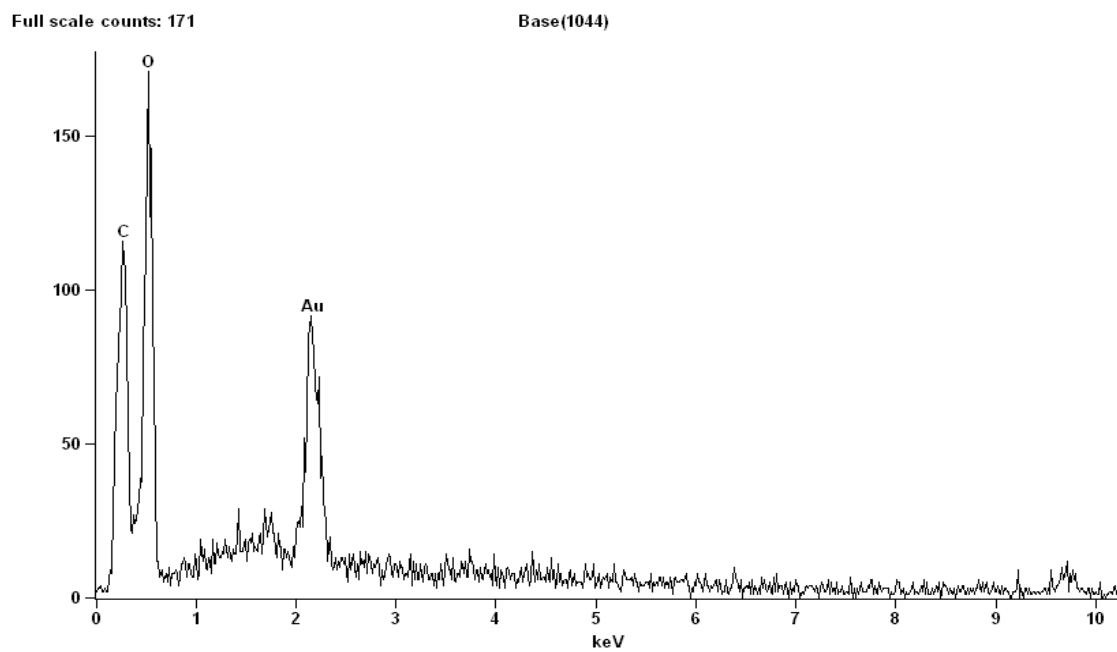

**(A)**

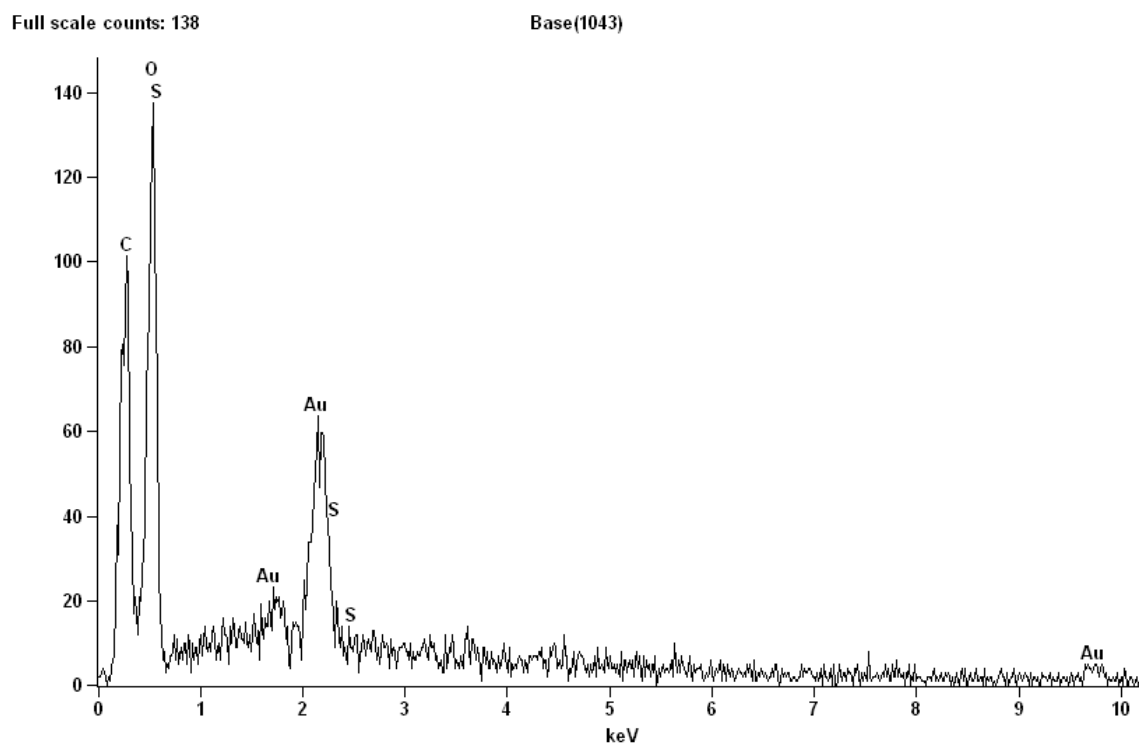

**(B)**

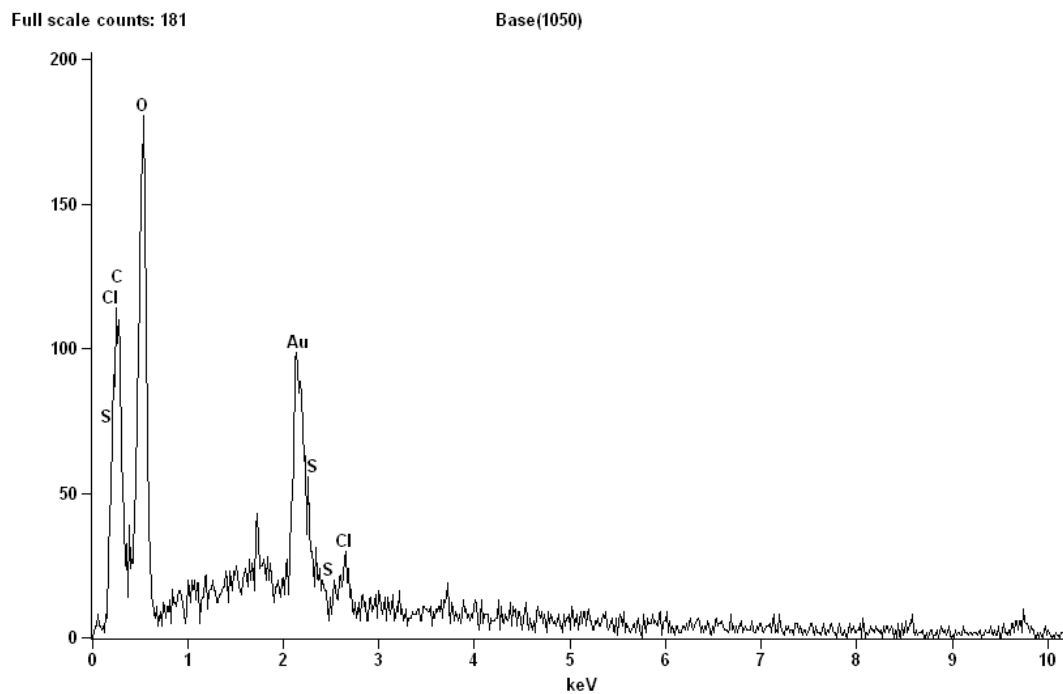

(c)

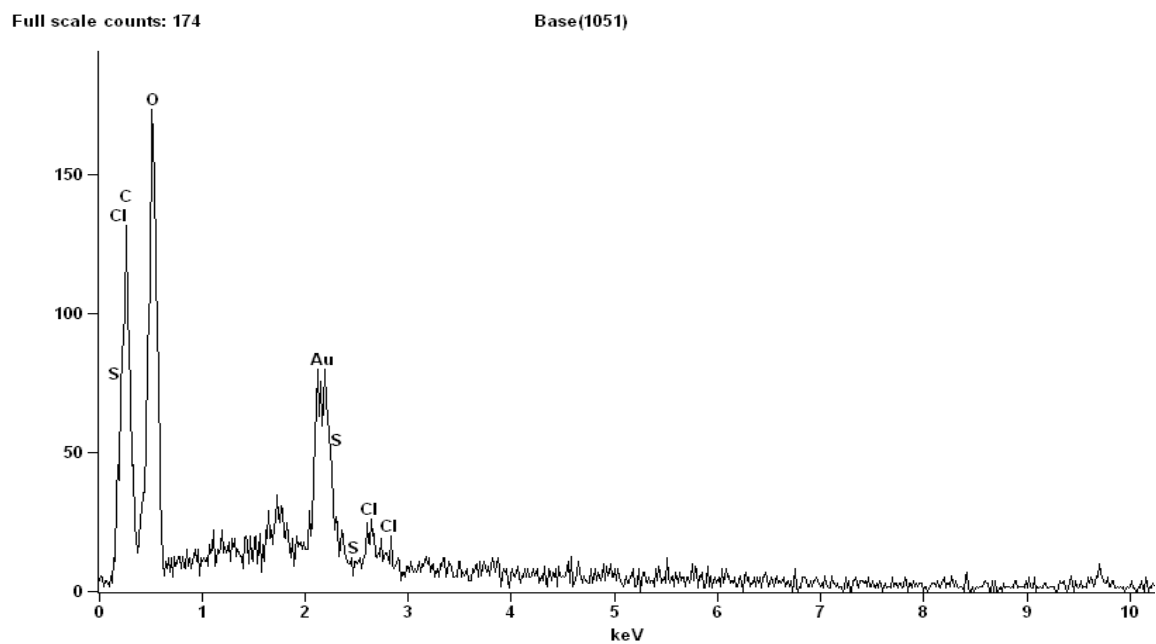

(d)

FIG S3: EDAX of compound 1-3 coated cloths (A-C) respectively

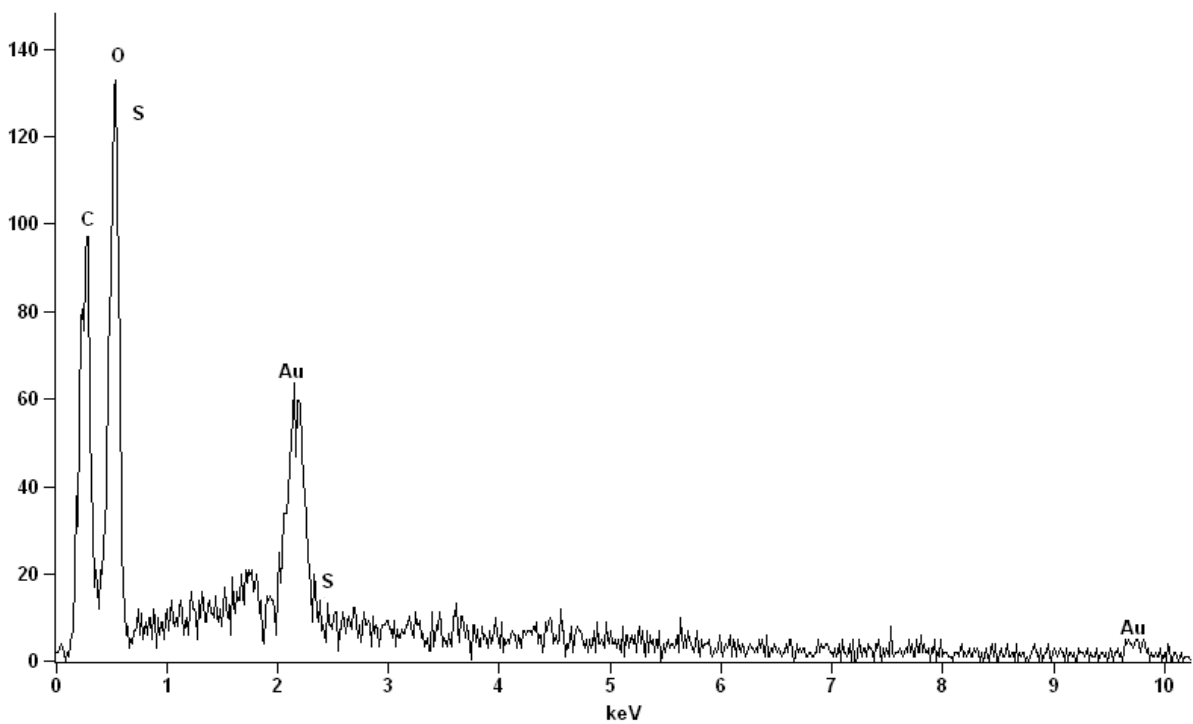

(A)

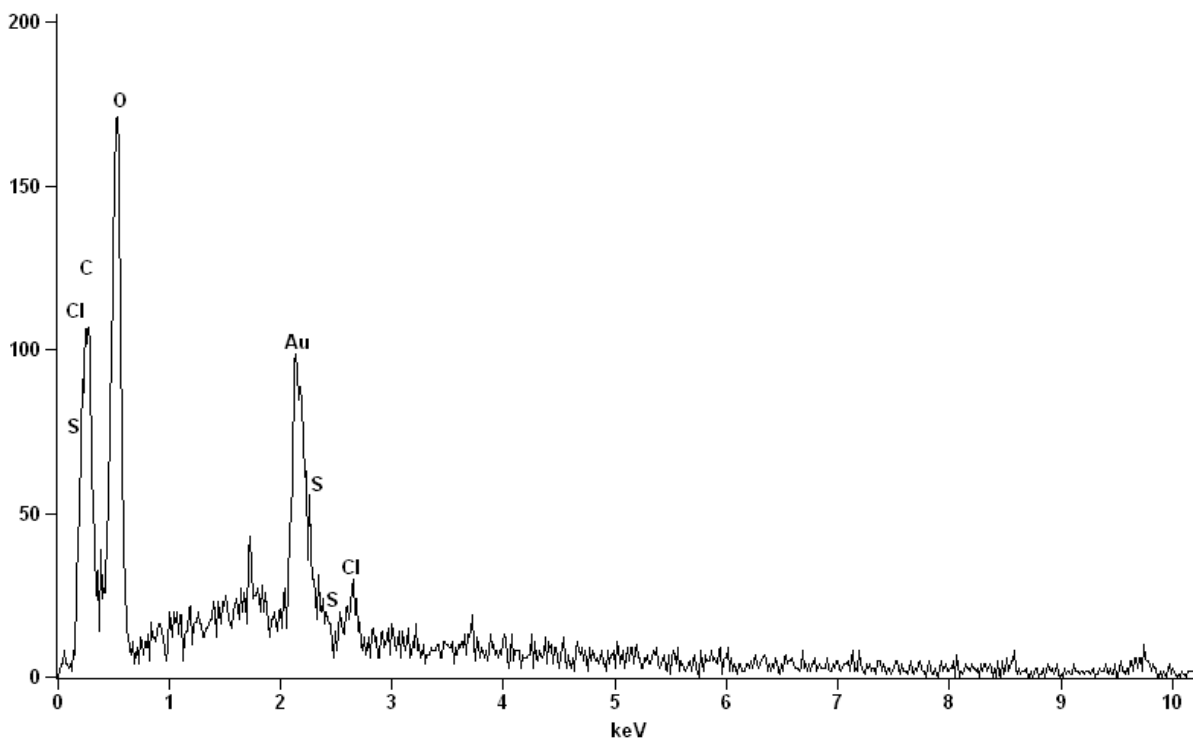

(B)

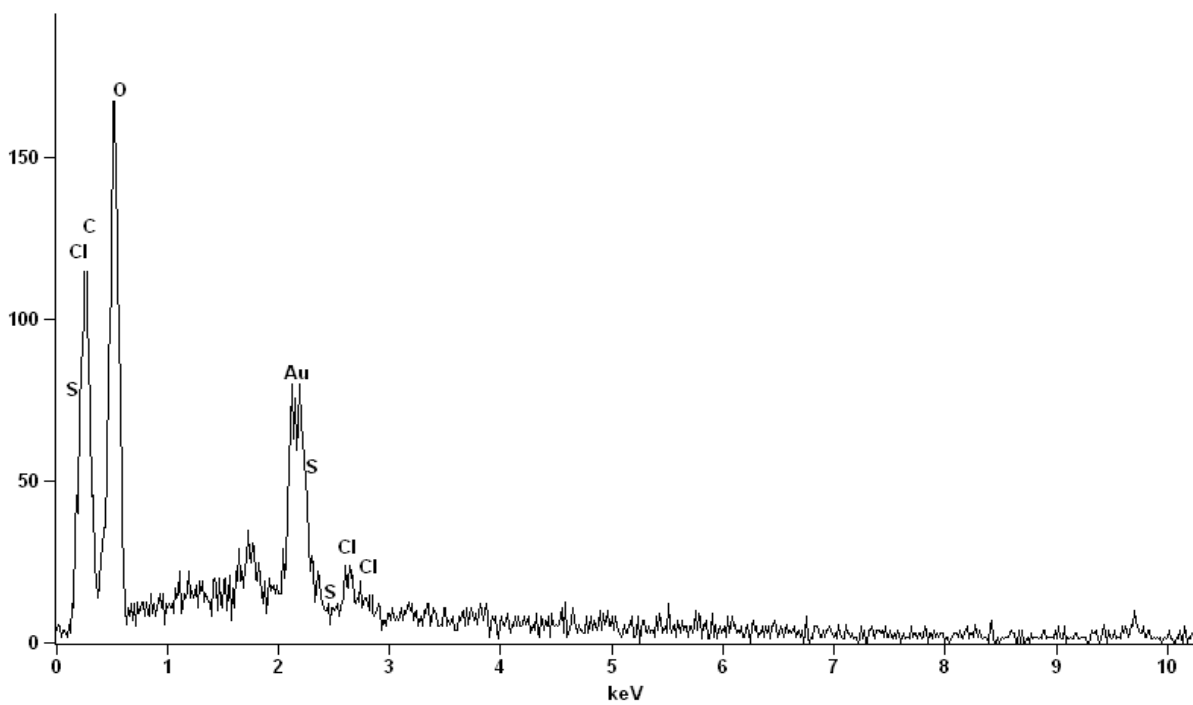

(C)
